# Supplementary material for: Development of hydrolysed protein-based plywood adhesive from slaughterhouse waste: effect of chemical modification of hydrolysed protein on moisture resistance of formulated adhesives
Source: Royal Society of Chemistry journal article supplement (doi:10.1039/c7ra09952e), 2018-01-01
Supplement: c7ra09952e1.pdf [file c7ra09952e1.pdf]

## Development of Hydrolysed Protein-Based Plywood Adhesive from Slaughterhouse Waste: Effect of Chemical Modification of Hydrolysed Protein on Moisture Resistance of Formulated Adhesives

Birendra B. Adhikari,<sup>1</sup> Vadim Kislitsin,<sup>2</sup> Pooran Appadu,<sup>1</sup> Michael Chae,<sup>1</sup> Phillip Choi,<sup>2</sup> and David C. Bressler<sup>1\*</sup>

### Supplementary Information

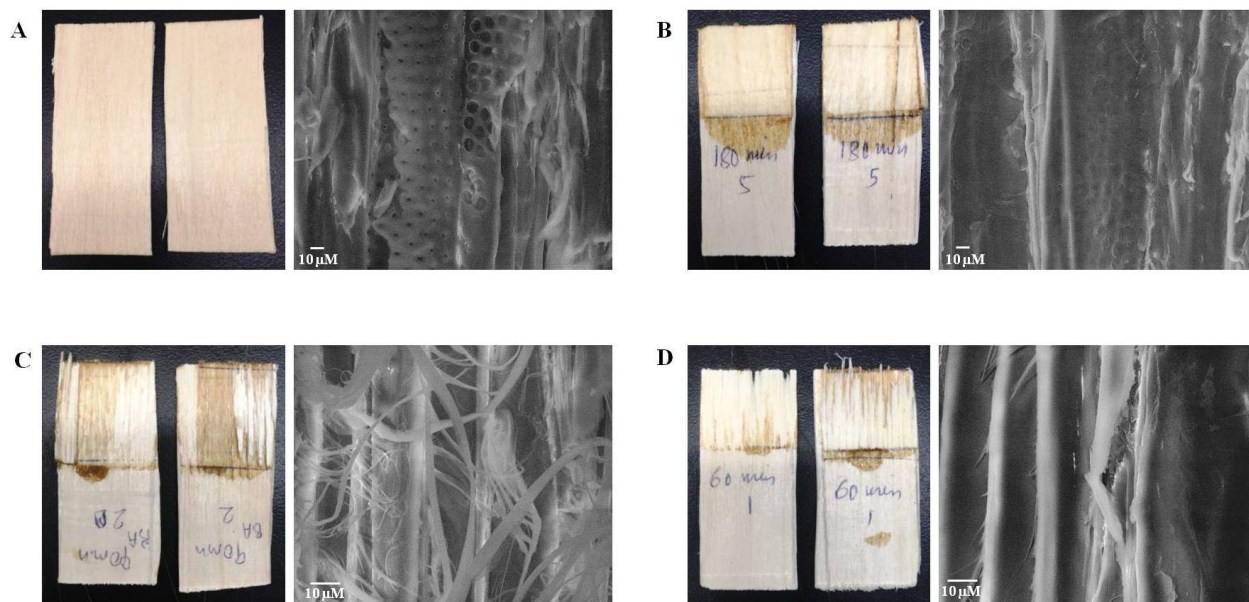

**Figure S1:** Representative photographs (left pane) and Scanning Electron Microscope (SEM) images (right pane) of veneers (A) and different types of failures observed at the time of lap shear strength analysis of plywood specimens bonded with peptides-PAE resin: adhesive failure (B); shallow wood failure with fibres pulled out (C); and deep wood failure from the bondline (D). SEM images were acquired using Zeiss Sigma Field Emission SEM operating at 20 kV. In the photographs of the fractured species, adhesive bonding had taken place in 20 mm × 20 mm area, which is the upper 2/5<sup>th</sup> of each species in the figures.
